# Supplementary material
Source: PubMed Central journal article supplement (PMC3698630)
Supplement: cr201349x2.pdf [file cr201349x2.pdf]

Figure S1

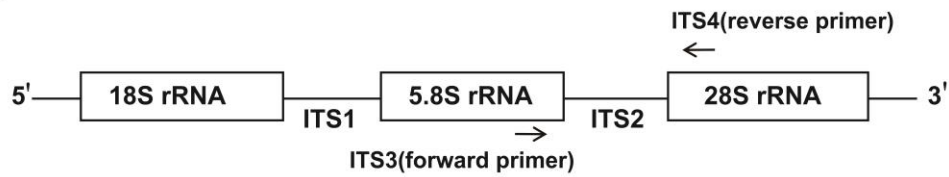

GTGAATTGCAGAATTCAGTGAATCATCGAATCTTTGAACGCAACTTGCGCCCTTTGGTATTCCGAAGGGCAT  
GCCTGTTTGAGAGTCATGAAAATCTCAATCCCTCGGGTTTTATTACCTGTTGGACTTGGATTTGGGTGTTTGC  
CGCGACCTGCAAAGGACGTCGGCTCGCCTTAAATGTGTTAGTGGGAAGGTGATTACCTGTCAGCCCGGCGT  
AATAAGTTTCGCTGGGCCTATGGGGTAGTCTTCGGCTTGCTGATAACAACCATCTCTTTTGTGACCTCAA  
ATCAGGTAGGGCTACCCGCTGAACTTAAGCATATCAATAAGCGGAGGAA

**Supplementary information, Figure S1** DNA sequence of the ribosome RNA internal transcribed spacer 2 (ITS2) of *C. neoformans* HS1101.
