# Supplementary material
Source: PubMed Central journal article supplement (PMC3698630)
Supplement: cr201349x3.pdf [file cr201349x3.pdf]

Figure S2

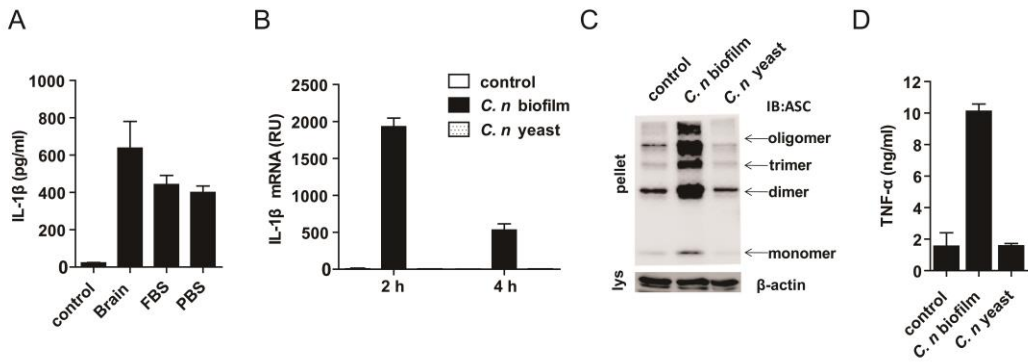

**Supplementary information, Figure S2** *C. neoformans* biofilm induces IL-1 $\beta$  production from THP-1 cells.

**(A)** *C. neoformans* biofilm was induced on PBS, FBS or mouse brain tissue homogenate pretreated polystyrene plates and then co-cultured with THP-1 cells for 12 h, IL-1 $\beta$  in supernatants was measured with ELISA. **(B)** THP-1 cells were treated with *C. neoformans* biofilm or yeast at MOI=1, 2 h or 4 h later cells were collected for IL-1 $\beta$  mRNA assay via real-time PCR. **(C)** THP-1 cells were challenged with *C. neoformans* biofilm or yeast at MOI=1, 12 h later ASC pyroptosome formation was detected through immunoblotting. **(D)** BMDCs from wild type mice were challenged with *C. neoformans* biofilm or yeast at MOI=1 for 12 h and the supernatants were harvested for TNF- $\alpha$  ELISA.

*Note, C. neoformans* abbreviated as *C. n* on figures.
