# Supplementary material
Source: PubMed Central journal article supplement (PMC3698630)
Supplement: cr201349x4.pdf [file cr201349x4.pdf]

Figure S3

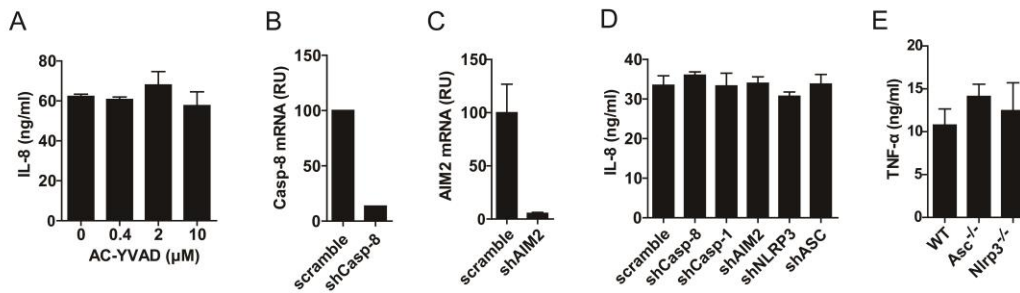

**Supplementary information, Figure S3** *C. neoformans* biofilm induction of IL-1 $\beta$  secretion from THP-1 cells is caspase-1 and NLRP3 inflammasome dependent.

(A) THP-1 cells were pretreated with AC-YVAD and then challenged with *C. neoformans* biofilm for 12 h and the supernatants were harvested for IL-8 ELISA. (B-C) caspase-8, or AIM2 mRNA level in THP-1 cells with shRNA silencing of caspase-8 or AIM2 were assayed via real-time PCR. (D) THP-1 cells with shRNA silencing of caspase-1, caspase-8, ASC, NLRP3, AIM2 or scramble were treated with *C. neoformans* biofilm for 12 h and the supernatants were collected for IL-8 ELISA. (E) BMDCs from wild type, *Nlrp3*-deficient and *Asc*-deficient mice were challenged with *C. neoformans* biofilm for 12 h and the supernatants were harvested for TNF- $\alpha$  ELISA.
