# Supplementary material
Source: PubMed Central journal article supplement (PMC3698630)
Supplement: cr201349x5.pdf [file cr201349x5.pdf]

Figure S4

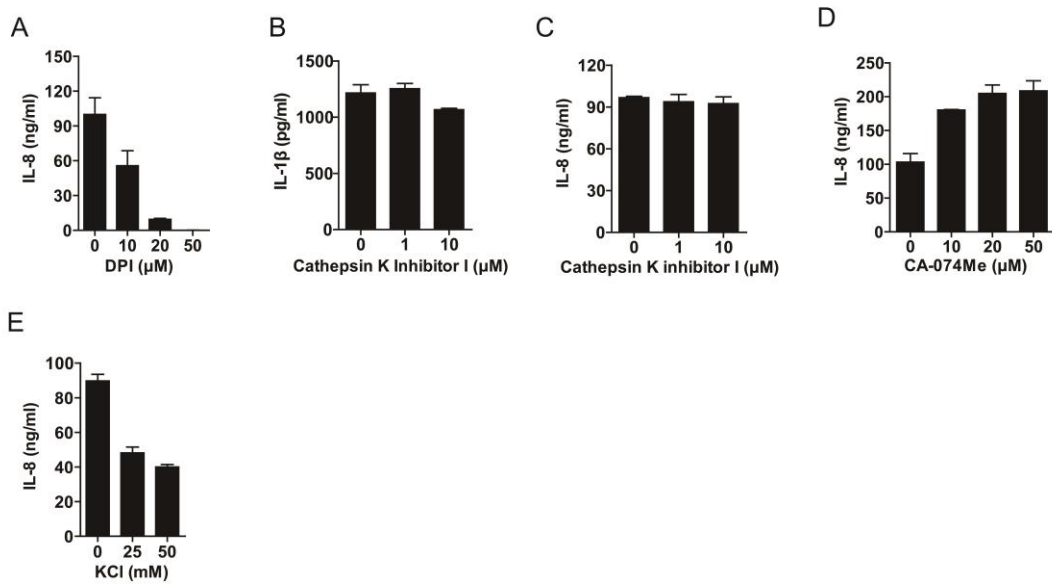

**Supplementary information, Figure S4** NLRP3 inflammasome activation by *C. neoformans*

biofilm needs ROS production and the Cathepsin B activity.

THP-1 cells were pretreated with DPI (A), Cathepsin K Inhibitor I (B-C), CA-074 Me (D), or KCl (E) for 30 min and then challenged with *C. neoformans* biofilm for 12 h. The supernatants were harvested for IL-1β and IL-8 ELISA.
